# Supplementary material for: A library of heptyl mannose-functionalized copolymers with distinct compositions, microstructures and neighboring non-sugar motifs as potent antiadhesives of type 1 piliated E. coli
Source: Royal Society of Chemistry journal article supplement (doi:10.1039/c6py00118a), 2016-01-01

## **A Library of Heptyl Mannose-Functionalized Copolymers with Distinct Compositions, Microstructures and Neighboring Non-Sugar Motifs as Potent Antiadhesives of Type 1 Piliated *E. coli***

Xibo Yan,<sup>1</sup> Adeline Sivignon,<sup>2,3</sup> Nicolas Barnich,<sup>2,3</sup> Sébastien G. Guoin,<sup>4</sup> Julie Bouckaert,<sup>5</sup>  
Etienne Fleury,<sup>1</sup> Julien Bernard<sup>1,\*</sup>

<sup>1</sup> Université de Lyon, Lyon, F-69003, France ; INSA-Lyon, IMP, Villeurbanne, F-69621, France; CNRS, UMR 5223, Ingénierie des Matériaux Polymères, Villeurbanne, F-69621, France.

<sup>2</sup> Clermont Université, UMR 1071, Inserm/Université d'Auvergne, 63000 Clermont-Ferrand, France.

<sup>3</sup> INRA, Unité Sous Contrat 2018, 63000, Clermont-Ferrand, France.

<sup>4</sup> LUNAM Université, CEISAM, Chimie Et Interdisciplinarité, Synthèse, Analyse, Modélisation, UMR CNRS 6230, UFR des Sciences et des Techniques, 2, rue de la Houssinière, BP 92208, 44322 Nantes Cedex 3, France.

<sup>5</sup> Unité de Glycobiologie Structurale et Fonctionnelle (UGSF), UMR 8576, Université Lille 1, F-59655 Villeneuve d'Ascq Cedex, France.

**Table S1.** Library of PGMA macroRAFT agents

| Entry | Polymers            | Conv. (%) | $Mn_{th}^a$ (g.mol <sup>-1</sup> ) | $Mn_{NMR}^b$ (g.mol <sup>-1</sup> ) | $Mn_{SEC}^c$ (g.mol <sup>-1</sup> ) | $\bar{D}^d$ |
|-------|---------------------|-----------|------------------------------------|-------------------------------------|-------------------------------------|-------------|
| 1     | PGMA <sub>65</sub>  | 61        | 8900                               | 9500                                | 11500                               | 1.31        |
| 2     | PGMA <sub>100</sub> | 61        | 13300                              | 14500                               | 20900                               | 1.25        |
| 3     | PGMA <sub>136</sub> | 64        | 18500                              | 19600                               | 28900                               | 1.15        |

<sup>a</sup>: Calculated from monomer conversion; <sup>b</sup>: Determined from relative integration of the aromatic chain end group and polymer backbone peaks; <sup>c</sup>: Determined from SEC analysis in THF and PS calibration (after acetylation); <sup>d</sup>:  $\bar{D}$  from SEC analysis in THF and PS calibration.

**Table S2.** DLS studies of post-modified copolymers.

| Entries | Copolymers                                                 | Diameter (nm) <sup>a</sup> |                                      |                  |
|---------|------------------------------------------------------------|----------------------------|--------------------------------------|------------------|
|         |                                                            | Ethanolamine (EA)          | (2-aminoethyl) trimethylammonium (A) | Taurine (T)      |
| 1       | PGMA <sub>65</sub> - <i>b</i> -PHMM <sub>133</sub>         | 15                         | 21                                   | 25               |
| 2       | P(GMA <sub>66</sub> -CO-HMM <sub>130</sub> ) <sup>B</sup>  | 18                         | 13                                   | 15               |
| 3       | P(GMA <sub>63</sub> -CO-HMM <sub>134</sub> ) <sup>SB</sup> | 20                         | 17                                   | 17               |
| 4       | PGMA <sub>100</sub> - <i>b</i> -PHMM <sub>107</sub>        | 15                         | 25                                   | n.d <sup>b</sup> |
| 5       | P(GMA <sub>103</sub> -CO-HMM <sub>108</sub> ) <sup>B</sup> | 10                         | 14                                   | n.d <sup>b</sup> |
| 6       | P(GMA <sub>95</sub> -CO-HMM <sub>107</sub> ) <sup>SB</sup> | 8                          | 9                                    | n.d <sup>b</sup> |
| 7       | PGMA <sub>136</sub> - <i>b</i> -PHMM <sub>65</sub>         | 9                          | 16                                   | n.d <sup>b</sup> |
| 8       | P(GMA <sub>134</sub> -CO-HMM <sub>66</sub> ) <sup>B</sup>  | 8                          | n.d <sup>b</sup>                     | n.d <sup>b</sup> |
| 9       | P(GMA <sub>134</sub> -CO-HMM <sub>66</sub> ) <sup>SB</sup> | 16                         | n.d <sup>b</sup>                     | n.d <sup>b</sup> |

<sup>a</sup>: determined from DLS analysis in pure water (1mg/mL); <sup>b</sup>: not determined due to aggregation.

**Figure S1.** Pseudo first-order kinetic plots of synthesis of PGMA<sub>65</sub>-*b*-PHMM<sub>133</sub> (Condition of polymerization given in experimental section)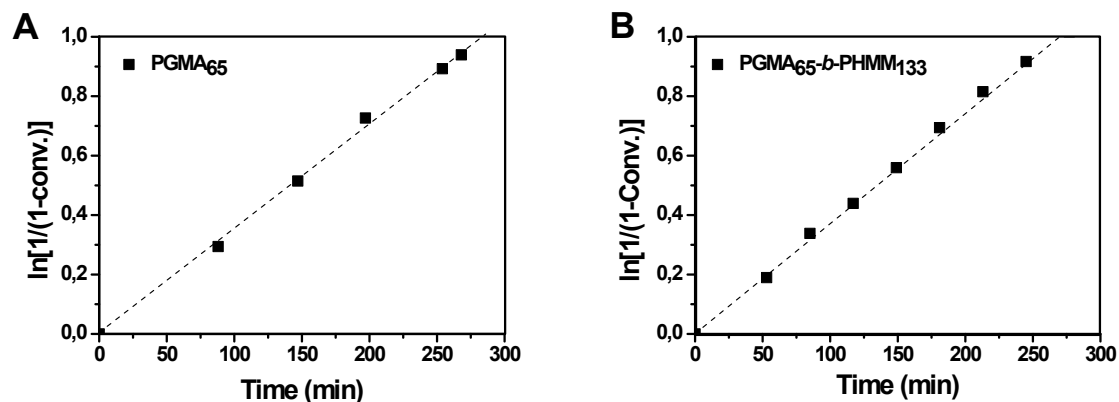

## Figure S2. NMR spectra

$^{13}\text{C}$  NMR spectra of  $\text{PGMA}_{65}$ ,  $\text{PHMM}_{188}$ ,  $\text{P}(\text{GMA}_{66}\text{-co-HMM}_{130})^{\text{B}}$  synthesized by batch copolymerization,  $\text{P}(\text{GMA}_{63}\text{-co-HMM}_{134})^{\text{SB}}$  synthesized by semi-batch copolymerization and  $\text{PGMA}_{65}\text{-}b\text{-PHMM}_{133}$  in  $\text{DMSO-}d_6$ .

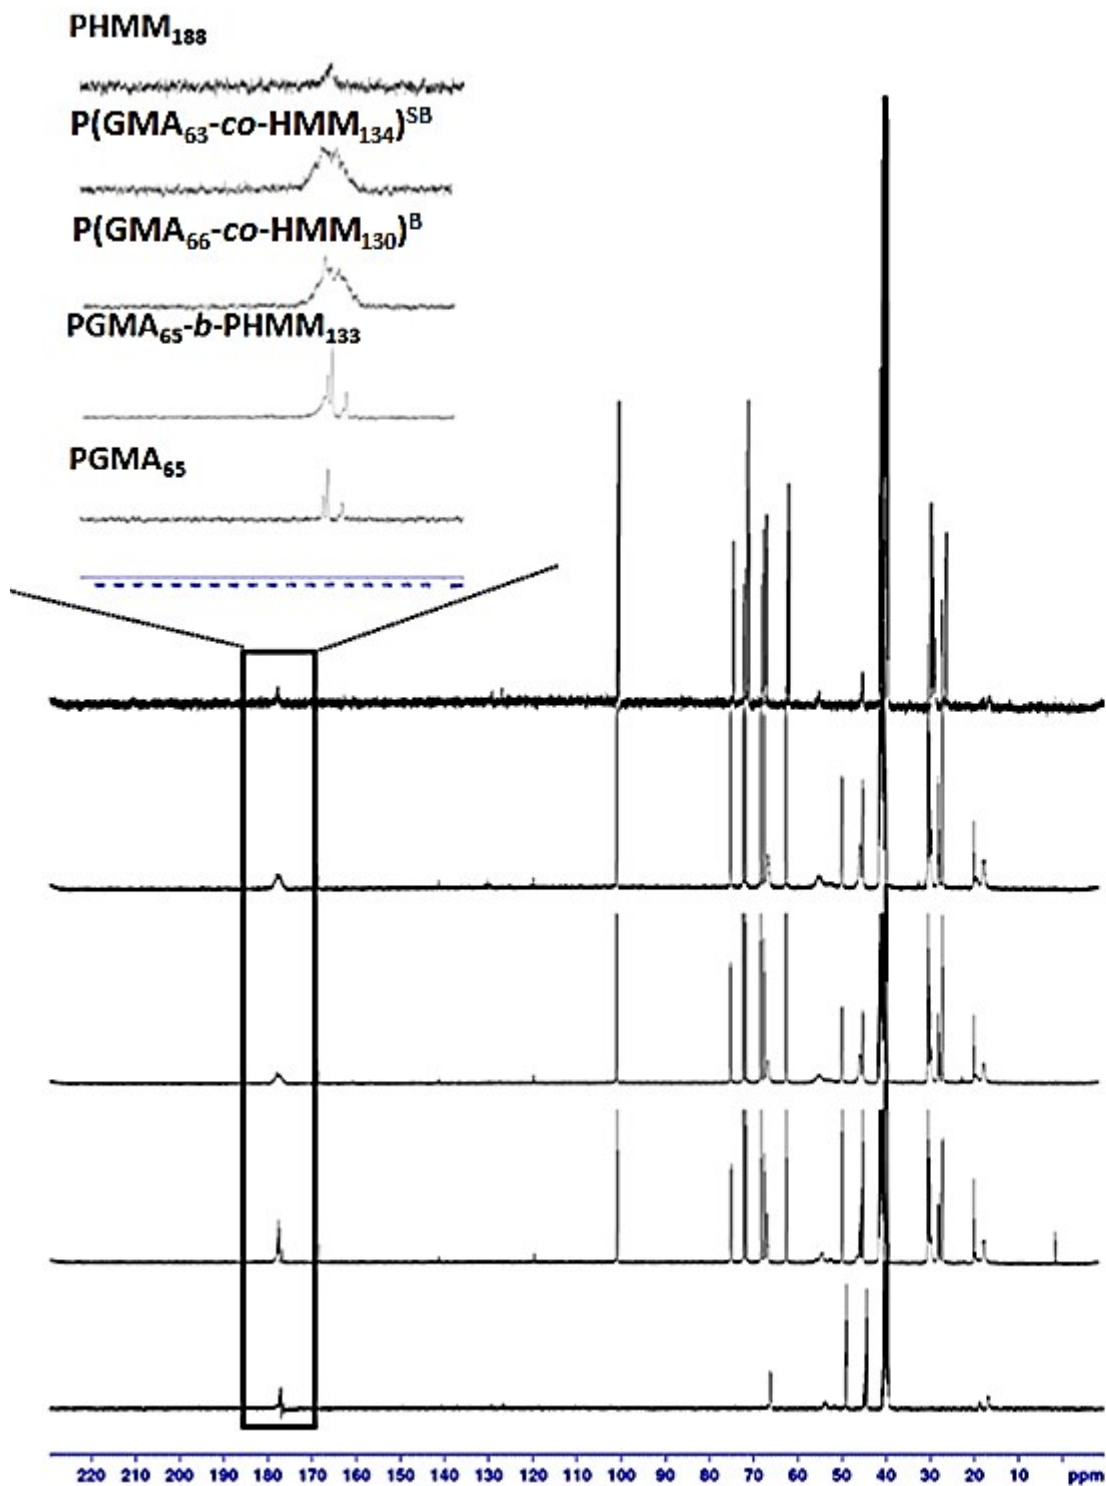

**$^1\text{H}$  and  $^{13}\text{C}$  NMR spectra of P(GMA63-co-PHMM134)<sup>SB</sup> in DMSO-*d*<sub>6</sub>**

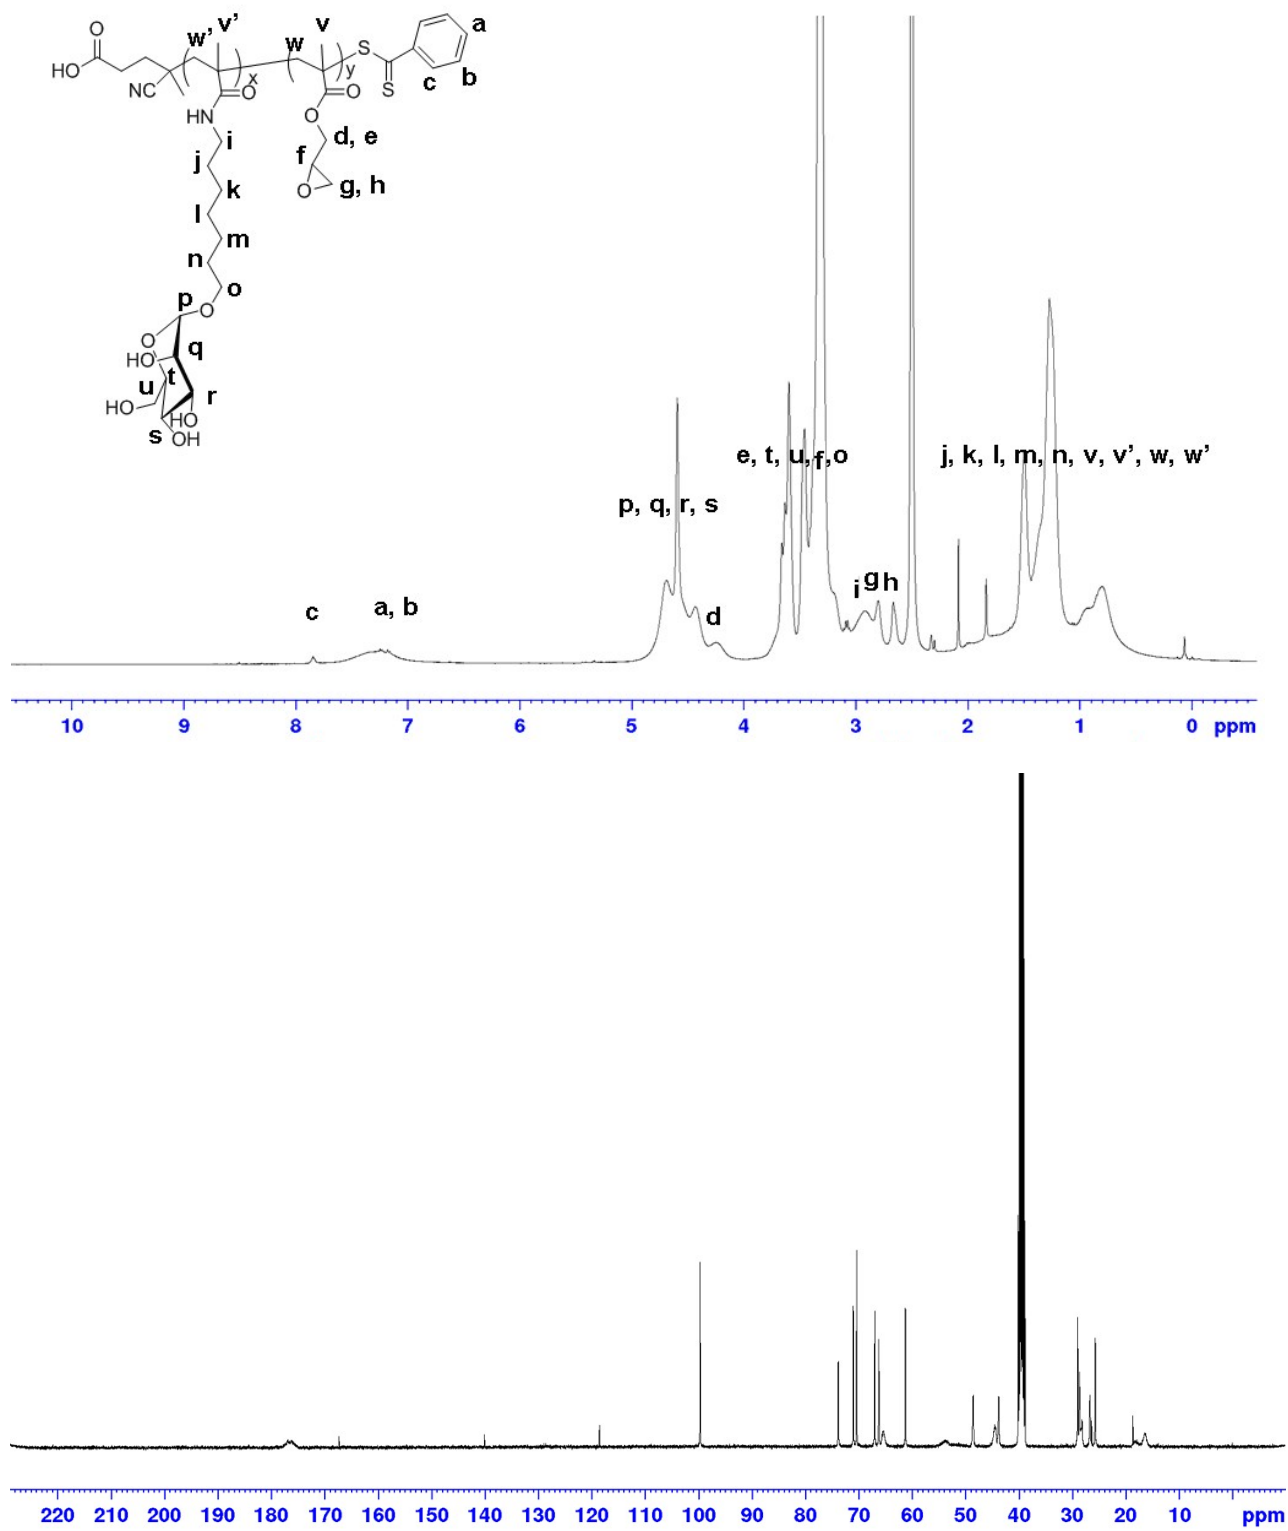

# $^1\text{H}$ and $^{13}\text{C}$ NMR spectra of 3EA in $\text{DMSO-}d_6$

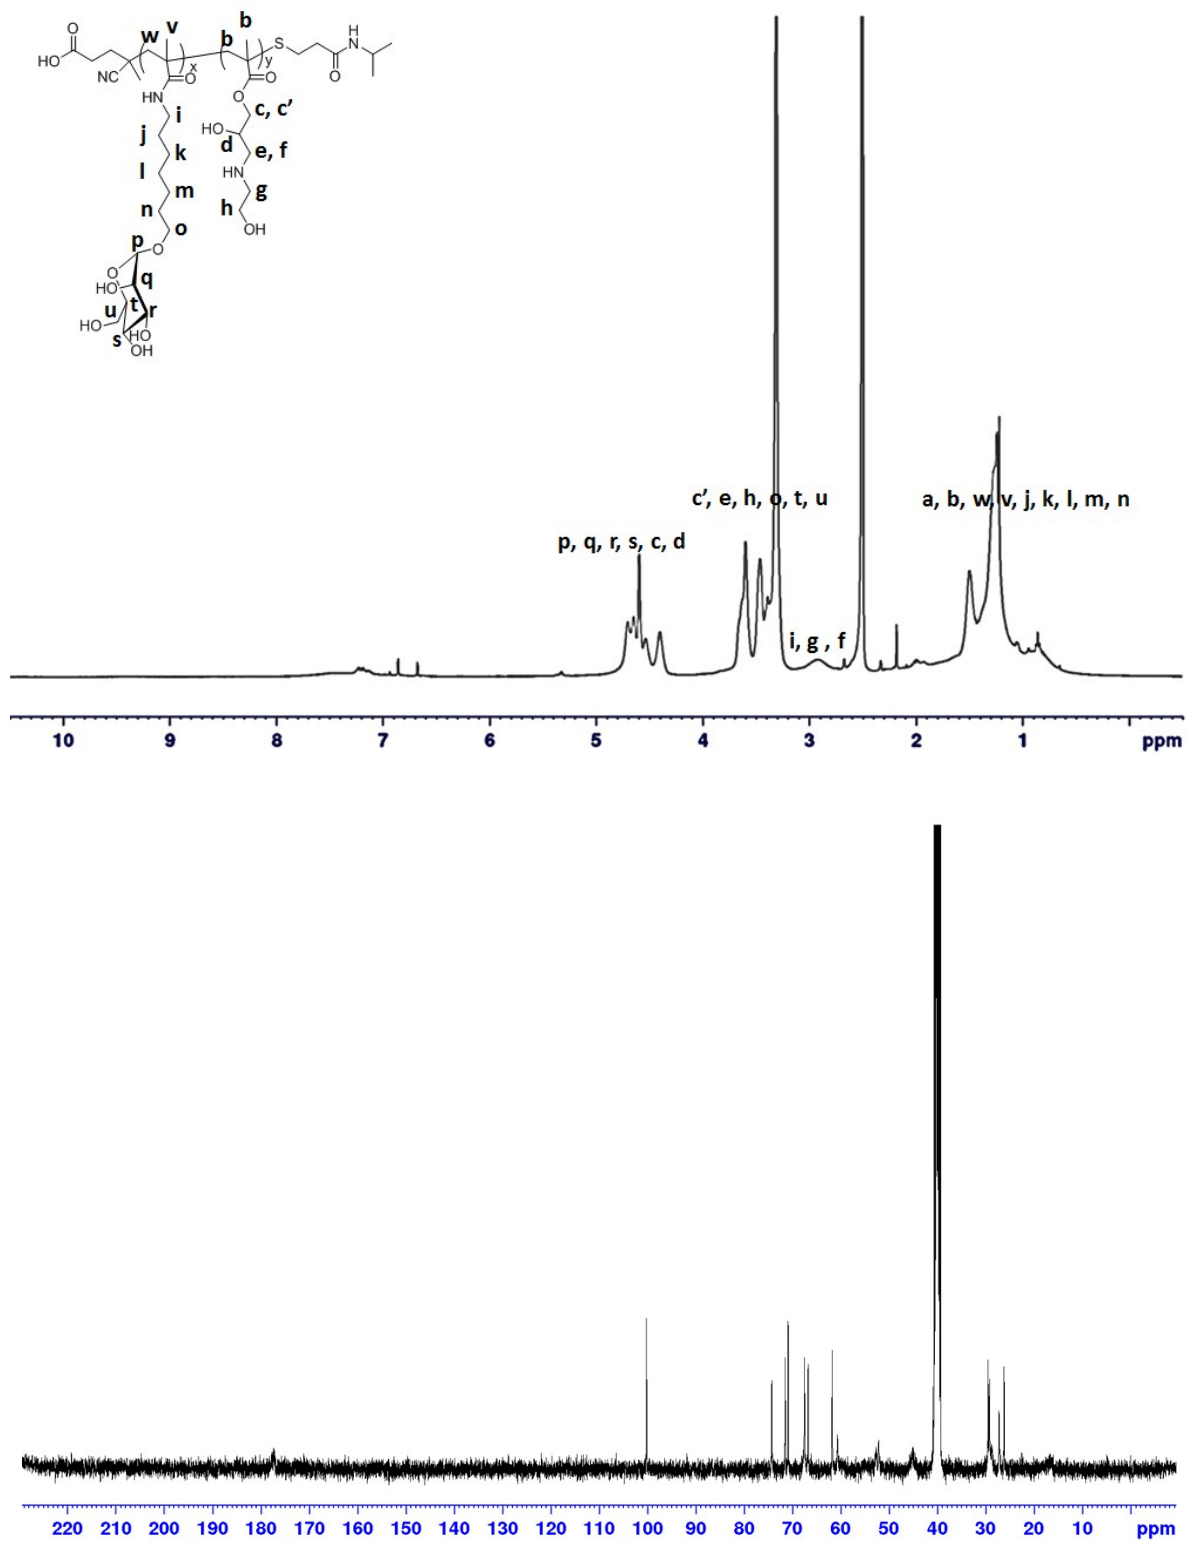

**<sup>1</sup>H NMR spectra of 3A in D<sub>2</sub>O**

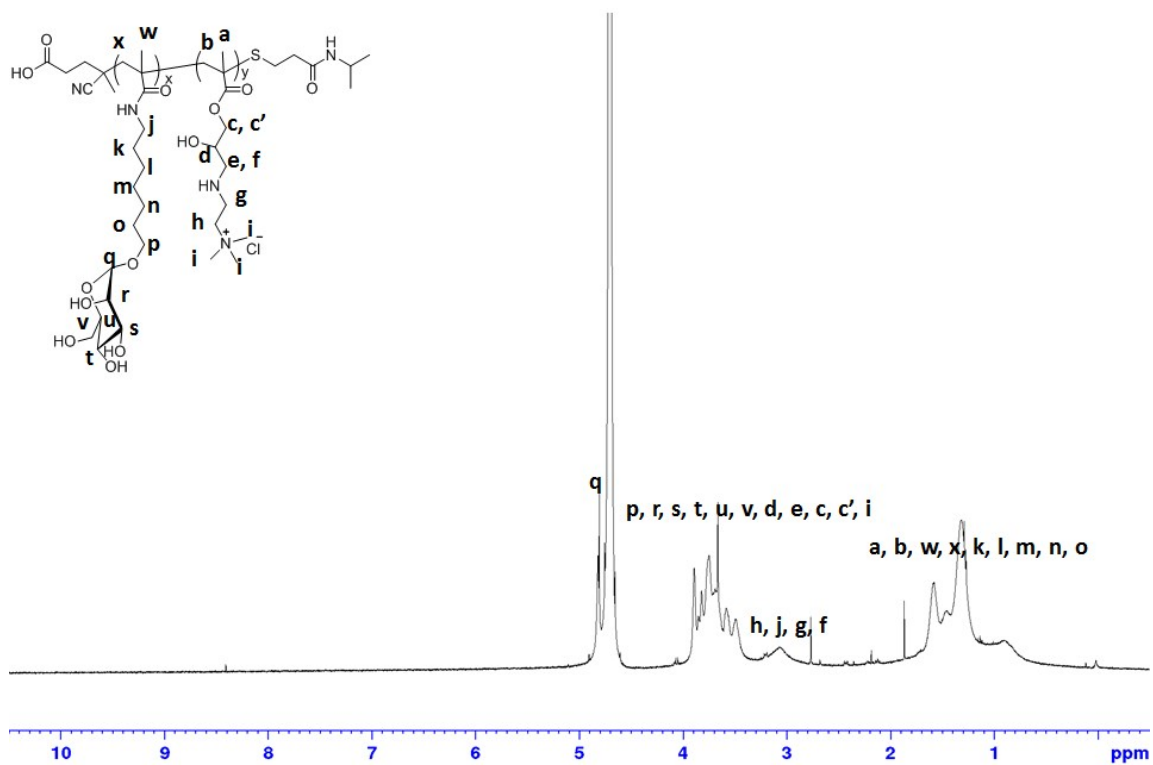

**<sup>1</sup>H NMR spectra of 3T in DMSO-d<sub>6</sub>**

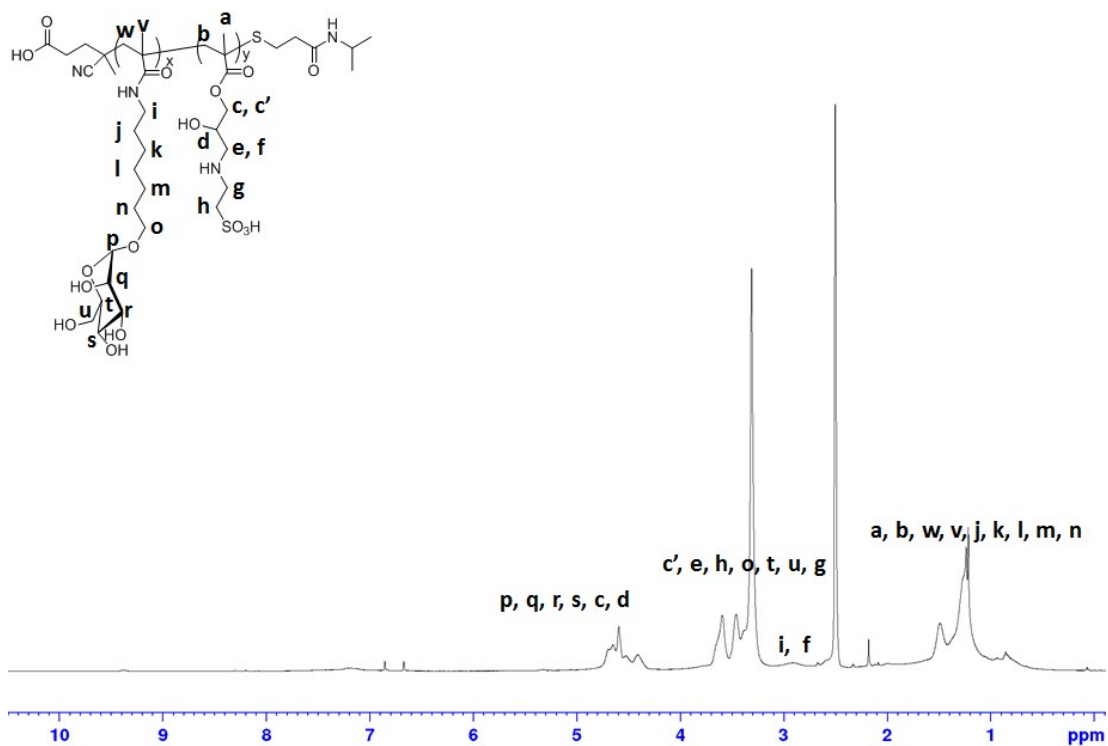

Figure S3: Viability of AIEC LF82 after incubation with glycopolymers for 3h at 37°C

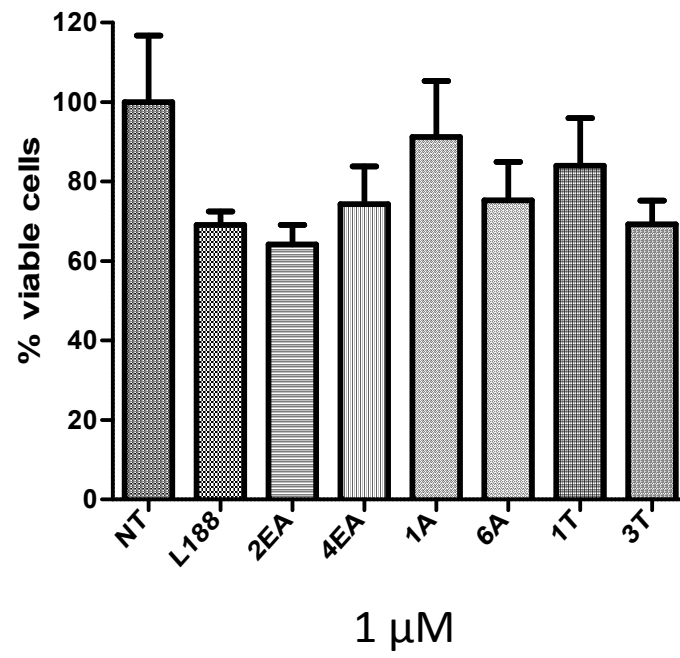

**Table S3: Viability of T84 cells exposed to glycopolymers for 3h at 37°C**

|           | %      |
|-----------|--------|
| NT        | 100    |
| DMSO      | 86,479 |
| L188      | 84,892 |
| 1EA       | 77,439 |
| 2EA       | 96,257 |
| 3EA       | 105,24 |
| 4EA       | 112,18 |
| 5EA       | 107,98 |
| 6EA       | 87,109 |
| 8EA       | 88,791 |
| 9EA       | 93,837 |
| 1A        | 101,19 |
| 2A        | 96,64  |
| 3A        | 88,485 |
| 6A        | 89,393 |
| 1T        | 92,642 |
| 2T        | 93,932 |
| 3T        | 89,919 |
| H202 10mM | 75,91  |
| H202 50mM | 26,565 |

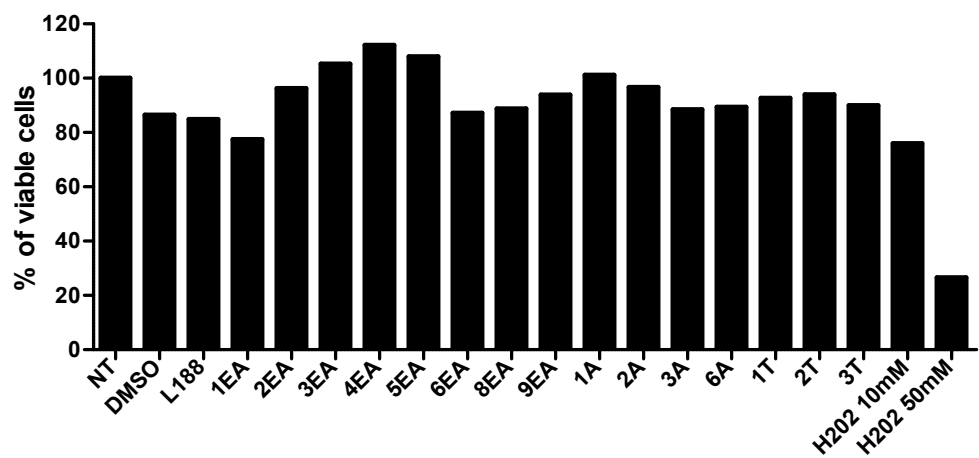

Supplement: c6py00118a1.pdf [file c6py00118a1.pdf]
